# Supplementary material for: Caspofungin Induced Cell Wall Changes of Candida Species Influences Macrophage Interactions
Source: Front Cell Infect Microbiol. 2020 May 12;10:164. doi: 10.3389/fcimb.2020.00164 (PMC7247809; doi:10.3389/fcimb.2020.00164)
Supplement: Supplementary file 2 [file Table_1.xls]

## Sheet: Chitin exposure measurements
Chitin
	Fluorescent measurements from individual cells (wheat-germ agglutinin staining)
	Calb	Calb + caspo	Cdub	Cdub + caspo	Cglab	Cglab + caspo	Ctrop	Ctrop + caspo	Clusit	Clusit + caspo	Cpara	Cpara + caspo	Cguill	Cguill + caspo
Rep (1) 1	164	495.6	177.7	403.7	98	73	168	511.06	132.8	518	143.12	207.3	161	472
2	153.1	493.21	127.2	445.1	81.7	108.9	154.6	518.52	133.6	435.2	168.12	210	183	435.4
3	171	534.32	167.7	435.4	76.9	86	154.6	517.21	169.6	446.3	170.03	214.4	160	448.3
4	168	532.92	150.7	375.5	71.2	77	155.5	510.73	161.3	441.3	169.27	192.2	171	445
5	172.1	465.11	153.5	351.7	95.6	88	198.8	539.9	145.4	424.4	146.79	213.4	171	458.7
6	170.3	450.18	150.9	371.9	108.4	85	172	473.98	152.9	396	118.21	227	159	437.4
7	159	516.8	166	381.4	91	78	191.3	496.42	104.4	444.4	178.97	193.2	156	566
8	191.4	470.1	178.7	434.8	101	102.9	164.6	527.95	241.5	489.2	182.91	200.1	153	445.9
9	164.5	554.7	159.4	386.7	83	86	209	524.26	114.5	427.6	145.92	177	182	438.6
10	156.2	450.9	138.4	419.7	125.7	89	181.4	496.67	149.6	423.1	147.08	141.2	239	475.6
11	168	648	149.1	441.3	64	72	177.6	517	155.3	471	170.5	198	159	483.4
12	144.5	501.34	172.4	410	95	85	172.3	518.68	157.5	443.7	172.5	222.1	162	467.8
13	141.3	455.83	105.9	416.1	92	77	172.7	516	161.5	448.7	173.19	156	105	486.5
14	159.4	434.74	194	353.8	51.4	76.7	169.5	497.66	160.6	425.4	170.1	223.2	157	474.4
15	159.2	534.72	168.5	348.4	67.2	57	223.9	523.63	170.4	314.3	171.41	130.4	108	426.4
16	145.4	428.82	218.2	429.4	62.5	71.8	240	512	136.3	462.7	168.98	186	161	422.7
17	166.4	422.69	123.9	394.2	94.4	61	204.9	423.6	153.9	442.6	172.33	188	168	440.5
18	171	464.34	99.8	378.8	101	79	164.9	513.92	184.2	399.2	170.36	202	183	454.7
19	196	474.19	179.5	407.4	89	84	187	487.91	151.2	431.9	200.14	202	142	442.5
20	173	516	156.9	442	148	76	191	522.02	177.3	440.3	203.38	262.1	159	482
21	176	550.42	158.8	321.9	87.2	81	160	464.01	157.2	427.8	174.13	265.4	165	304.6
22	206	439	144.3	368.6	88	138	159	510.94	146.1	469.7	169.76	205	150	453.7
23	202	499	160.7	397.6	91	82	200.7	476.28	255.6	420.6	147.09	202.9	146	458.4
24	166	423	179	517.3	84.3	78	161	602.49	117.6	430.3	174.04	215.5	137	474.6
25	132	441.13	177.6	434.3	79	82	161.9	688.19	189.9	466.8	172.91	340.4	120	326.4
26	164	548	165.6	373.2	90	65	171.2	660.73	165.5	406.1	179.62	142.9	132	406.8
27	177.1	470.11	166.3	453.8	88	34	158.3	516	159.6	424.3	177.8	221.5	130	408.3
28	169	497	120.1	396	75	30	163.9	478	136	459.3	292.69	148.8	201	451.2
29	164	435	186.7	428.9	94	79	170.4	438.13	169.2	454.1	171.08	212.4	222	448.5
30	173.4	492	188.1	414.7	89	90	194.3	488.06	164	451.1	171.37	112.1	164	442.3
Rep (2) 1	180	527	197	490	66	99	203	555	123	523	156	311	133	503
2	169	503	175	401	87	103	211	563	117	514	163	250	138	433
3	181	476	172	412	82	77	180	541	156	510	165	263	207	427
4	181	423	174	466	93	121	183	532	162	436	171	271	222	423
5	177	466	161	423	75	70	174	529	188	455	153	202	136	412
6	161	451	167	366	70	88	171	498	176	412	157	241	147	420
7	176	507	154	377	88	69	176	483	190	478	278	236	156	489
8	159	516	157	394	109	73	178	600	177	465	264	228	151	466
9	166	432	160	399	83	75	145	588	177	423	144	265	188	473
10	190	480	159	405	84	94	160	478	153	399	156	233	101	514
11	162	481	134	412	66	82	169	465	162	422	163	234	155	433
12	162	526	147	433	76	89	173	437	167	456	168	202	147	428
13	162	444	188	402	82	77	164	493	133	477	173	199	143	444
14	173	475	164	400	92	70	169	417	157	435	199	203	122	461
15	167	456	162	385	88	66	173	477	200	412	185	284	139	438
16	168	473	171	392	86	54	206	456	198	422	182	234	138	444
17	171	495	200	391	85	55	199	451	164	419	166	261	184	458
18	114	490	153	391	72	74	170	488	169	410	157	200	222	452
19	157	466	169	423	70	78	173	524	144	406	158	199	165	499
20	168	463	164	404	77	70	166	563	146	400	135	221	199	472
21	160	423	158	400	64	104	167	522	133	427	129	216	152	408
22	165	477	137	388	98	98	183	577	134	430	138	216	149	368
23	178	473	140	393	73	113	194	488	105	415	188	216	113	422
24	176	489	163	351	65	74	177	497	156	419	196	223	137	422
25	163	465	162	411	70	72	177	564	178	512	189	289	143	465
26	170	488	159	406	89	71	172	544	195	499	203	256	155	471
27	171	487	211	406	83	59	165	496	188	433	156	267	165	460
28	163	500	184	401	88	67	168	533	167	428	176	196	157	534
29	164	467	172	410	73	80	144	527	173	421	172	205	197	530
30	167	462	170	399	104	83	186	604	170	462	180	208	189	461
Rep (3) 1	153	545	166	389	109	74	182	594	137	430	223	204	194	468
2	164	483	162	352	89	66	197	622	180	402	161	211	166	440
3	169	481	155	384	83	62	200	566	188	415	169	184	153	437
4	170	701	153	404	83	83	176	502	205	413	158	176	151	412
5	178	440	136	403	72	94	171	511	175	413	138	200	204	404
6	173	457	163	397	77	97	186	534	155	475	157	167	167	427
7	161	457	167	361	78	88	182	500	160	437	163	162	164	423
8	164	491	133	359	90	76	166	498	147	387	163	155	164	458
9	228	554	121	403	94	71	179	477	143	471	171	145	152	433
10	149	547	174	403	89	114	156	433	136	444	194	150	108	429
11	162	543	170	462	111	121	164	522	158	439	183	157	114	434
12	169	633	162	400	124	77	167	514	158	432	187	221	119	402
13	115	464	113	387	86	72	170	517	111	406	135	163	127	379
14	166	550	118	393	81	88	173	533	166	466	118	184	167	542
15	146	521	192	406	70	123	211	571	191	501	166	200	162	377
16	163	485	164	409	79	81	228	466	170	489	164	204	111	446
17	160	466	167	344	95	81	175	504	190	473	169	193	188	448
18	176	601	123	406	93	49	178	607	104	478	178	192	200	465
19	180	467	125	401	103	59	133	682	101	433	201	203	197	472
20	167	432	120	467	126	54	130	502	159	442	173	196	193	381
21	167	576	166	501	84	125	177	509	179	448	170	206	176	372
22	166	423	169	488	81	85	178	518	162	431	122	206	173	455
23	168	408	168	400	135	63	257	487	168	436	207	99	116	448
24	164	480	163	402	54	76	250	421	181	430	173	203	208	564
25	159	401	240	311	84	66	177	399	184	394	171	89	164	452
26	201	467	241	293	134	68	176	524	144	324	162	113	161	460
27	168	462	111	404	86	38	178	532	99	417	159	118	184	377
28	113	475	114	502	83	38	136	521	97	422	188	101	133	355
29	166	466	161	500	148	34	183	394	66	413	180	201	174	422
30	172	530	120	400	150	79	175	543	237	427	178	180	122	465
Mean	166.681	488.069	160.073	404.396	88.5722	78.6589	178.237	516.277	158.706	438.26	171.942	202.494	159.644	445.062
SD	16.6785	51.4247	26.2798	39.6127	19.2703	19.8672	22.1418	54.3361	30.9919	35.4653	27.6282	45.0876	29.3136	43.561
Supplementary Table 1. Region of interest measurements of wheat-germ agglutinin exposed (chitin) and Fc-dectin1 staining (exposed glucan) of untreated and caspofungin treated cell from each Candida spp.

## Sheet: Glucan exposure measurements
Glucan
	Fluorescent measurements from individual cells (fc-dectin1 staining)
	Calb	Calb + caspo	Cdub	Cdub + caspo	Cglab	Cglab + caspo	Ctrop	Ctrop + caspo	Clusit	Clusit + caspo	Cpara	Cpara + caspo	Cguill	Cguill + caspo
	Mean	Mean	Mean	Mean	Mean	Mean	Mean	Mean	Mean	Mean	Mean	Mean	Mean	Mean
Rep (1) 1	184.5	532.17	216.4	342.2	268.09	266.61	150.3	656.53	157.42	498	202.7	185.31	192	590
2	179.6	454.4	212	365.6	286.73	302.91	101.9	640.41	196.85	504.6	202	193.31	208	594
3	185.3	450.41	219	366.3	282.23	251.32	191.8	607.21	190.49	468	234.4	197.74	284	509
4	179	448.96	213.3	339.3	248.93	277.82	176	630.48	150.58	440	215.7	181.99	252	552
5	176.7	489.21	215.4	348.6	288.17	297.54	192.2	664.82	189.67	405.1	201.2	170.74	263	568
6	180.6	412.93	209.3	417	291.64	239.1	170.4	642.16	161.71	416	207.6	182.24	263	510
7	179.2	450.92	213.9	345	254.63	303.32	227.5	635.17	154.66	403.3	202	189.3	290	532
8	178.8	441.86	205	407.3	239.55	286.8	226.4	600.58	305.04	414.8	200	192.65	261	532
9	150.2	506.94	216.7	513.1	263.56	257.32	197.3	521.01	161.5	429.4	190.2	183.84	301	512
10	116	434.56	214.2	401.4	285.88	275.35	167	649	154.4	419.5	207.1	185.31	245	500
11	167	508.17	208.7	452.3	274.11	265.08	279.2	639.22	193.91	492.1	171.3	187.4	265	490
12	152.2	430.72	201.6	499.4	233.15	284.73	210.8	605.66	157.85	477	206.9	199.89	309	505
13	179.1	464.89	210	449.5	299.09	276.93	203	636.29	170	478.8	210.8	200.18	263	553
14	179.7	441.59	199.1	358.6	286.88	278.71	201.8	705.46	161.22	501.1	184.7	193.56	263	487
15	179	440	230.5	367.7	293.35	222.41	81.4	602.69	180.21	483	185	273.56	259	533
16	251.4	444.63	214.8	335.8	272.18	284.77	191.9	503.66	163	558	198	197.15	244	483
17	181.4	434.75	214.4	374.1	223.59	247.85	188.7	506.25	160	560	200	246.15	260	483
18	179.5	511.98	190	295.4	266.55	242.21	157.5	603.65	160.04	494	201.9	194.66	263	425
19	179	417.25	216.9	378.3	272.44	242.84	189.3	540	137.78	387	174	162.65	313	510
20	178	448.11	217.1	285	257.82	248	155.6	578	168.02	485	207.9	135.29	207	535
21	181.5	450.73	217.5	379.3	296.88	294.31	158.3	660.41	187.67	450	190.9	194.27	199	570
22	181.1	503.81	197	374.6	287.3	198.34	163	602.49	160.9	528.1	201	188.48	308	485
23	185.9	401.9	212	360.2	292.13	316.04	204.1	746.79	183.42	370	217	185.2	263	570
24	180.3	416.87	213.9	339.8	282.45	252.64	225.3	719.54	170	464	207	173.42	240	484
25	180.1	422.96	213.4	362.9	280.64	267.76	207.7	608.52	139.47	467.1	201	212.75	240	523
26	178.6	451.93	214	358.6	245.66	248.01	217	607.47	157.56	570	209.2	144.79	212	740
27	178.8	402.39	212.7	373.6	310.6	252.97	189	555.89	182.09	456.3	207.4	120.14	320	493
28	183.5	432.05	215	325.7	275.52	200.61	113.4	501.46	155.39	456	201	218.83	326	786
29	200	404.67	212.6	341.9	265.58	196.74	193	461.68	158.85	473	210	228.69	287	535
30	178.9	453.06	216.6	373.8	273.79	139.83	157.8	563.54	173.38	476	178	155.54	299	535
Rep (2) 1	155	502	210	502	300	301	164	611	171	489	211	174	288	500
2	162	487	213	504	255	268	175	701	181	465	203	192	254	554
3	167	476	217	452	294	272	200	623	189	455	207	182	263	567
4	188	433	218	412	273	276	188	665	186	473	197	187	294	589
5	175	444	208	366	266	263	174	642	176	460	188	165	276	532
6	173	450	204	322	261	269	195	589	172	457	199	173	273	548
7	173	439	210	337	288	280	193	622	165	496	209	192	255	562
8	199	475	201	374	273	271	155	578	162	452	204	183	268	544
9	144	503	211	341	299	275	173	623	163	469	206	190	273	538
10	148	477	208	362	257	255	138	641	157	473	212	210	241	501
11	177	482	206	381	266	247	162	637	153	472	189	174	238	566
12	172	486	206	300	261	268	188	600	153	453	199	178	267	599
13	166	467	209	299	263	261	201	607	173	480	202	199	222	534
14	183	488	214	361	312	250	178	574	166	480	202	195	237	521
15	180	488	217	384	263	284	166	588	154	495	205	187	288	570
16	210	434	220	322	275	376	195	602	161	466	206	173	274	546
17	174	475	216	334	276	283	143	579	163	444	215	164	268	533
18	155	432	213	312	288	242	154	567	144	452	200	155	284	524
19	162	445	211	325	290	246	188	599	147	457	203	176	268	577
20	162	462	210	341	231	233	183	605	156	467	207	195	255	533
21	144	437	217	361	238	227	145	633	163	433	199	191	267	521
22	184	412	214	336	242	264	122	660	178	455	205	191	248	563
23	199	426	214	333	266	266	165	570	173	435	218	183	284	544
24	204	440	215	410	211	287	164	532	193	441	201	168	241	522
25	167	495	219	491	281	232	169	623	200	468	203	170	277	533
26	183	504	210	488	295	244	166	634	173	460	198	196	251	521
27	172	466	219	361	247	271	174	621	189	479	216	210	289	574
28	160	472	200	344	247	280	211	606	201	463	202	157	301	568
29	161	462	218	304	247	256	167	602	199	478	207	166	312	563
30	169	442	217	312	253	255	111	588	166	478	208	167	294	523
Rep (3) 1	178	441	217	330	256	241	210	576	162	455	192	199	276	600
2	192	437	217	374	288	243	204	563	163	475	209	194	245	551
3	204	399	213	372	275	222	199	532	155	463	201	196	267	581
4	176	397	216	306	273	223	286	687	153	405	196	195	288	569
5	175	450	213	380	268	237	244	602	150	469	206	183	264	534
6	147	456	215	371	269	240	189	610	120	488	207	186	233	531
7	158	411	217	384	286	209	207	600	211	473	217	162	274	546
8	162	417	214	366	247	238	208	604	210	577	211	158	288	532
9	167	423	216	399	293	256	220	607	200	451	213	170	294	502
10	185	475	254	401	273	243	168	400	188	460	217	173	291	524
11	182	462	219	384	268	247	176	510	164	473	189	186	290	577
12	209	513	203	380	266	214	159	611	173	462	188	358	291	498
13	222	387	211	376	299	199	184	621	173	490	203	189	234	254
14	186	424	252	375	302	260	202	721	194	483	202	190	246	548
15	194	478	129	365	271	264	207	608	159	455	202	204	255	540
16	193	452	210	333	278	289	206	621	162	499	202	207	257	549
17	172	453	210	374	279	274	235	750	113	468	189	210	269	340
18	176	438	210	394	283	270	270	623	110	460	186	203	274	232
19	204	422	211	392	276	224	276	620	235	472	195	202	234	792
20	231	438	208	486	244	235	152	623	270	468	182	194	256	538
21	186	403	210	399	240	175	112	450	173	392	174	193	250	522
22	162	376	211	403	292	173	99	412	176	463	200	250	312	533
23	199	450	181	421	293	143	165	589	157	493	204	287	356	568
24	174	450	209	374	304	287	187	800	166	501	206	168	223	576
25	177	322	212	375	272	315	204	750	162	512	208	176	220	530
26	201	449	168	374	315	369	225	606	170	200	164	172	180	548
27	227	460	181	373	312	341	289	624	188	590	240	171	267	550
28	176	477	212	487	272	257	278	657	69	601	155	183	80	524
29	176	451	213	279	274	250.1	101	584	173	460	201	173	277	549
30	174	448	214	288	270	300	184	581	170	467	203	199	271	560
Mean	178.866	449.609	211.044	373.537	272.835	257.322	184.907	607.334	170.434	467.724	201.21	189.434	263.456	536.578
SD	19.5132	34.1573	13.7418	52.1325	20.9033	38.6262	40.753	66.046	28.6815	48.7545	12.751	30.2129	36.0487	72.036
